# Supplementary material
Source: MDPI journal article supplement (https://www.mdpi.com/2673-7418/2/4/28)
Supplement: s1 [file s1]

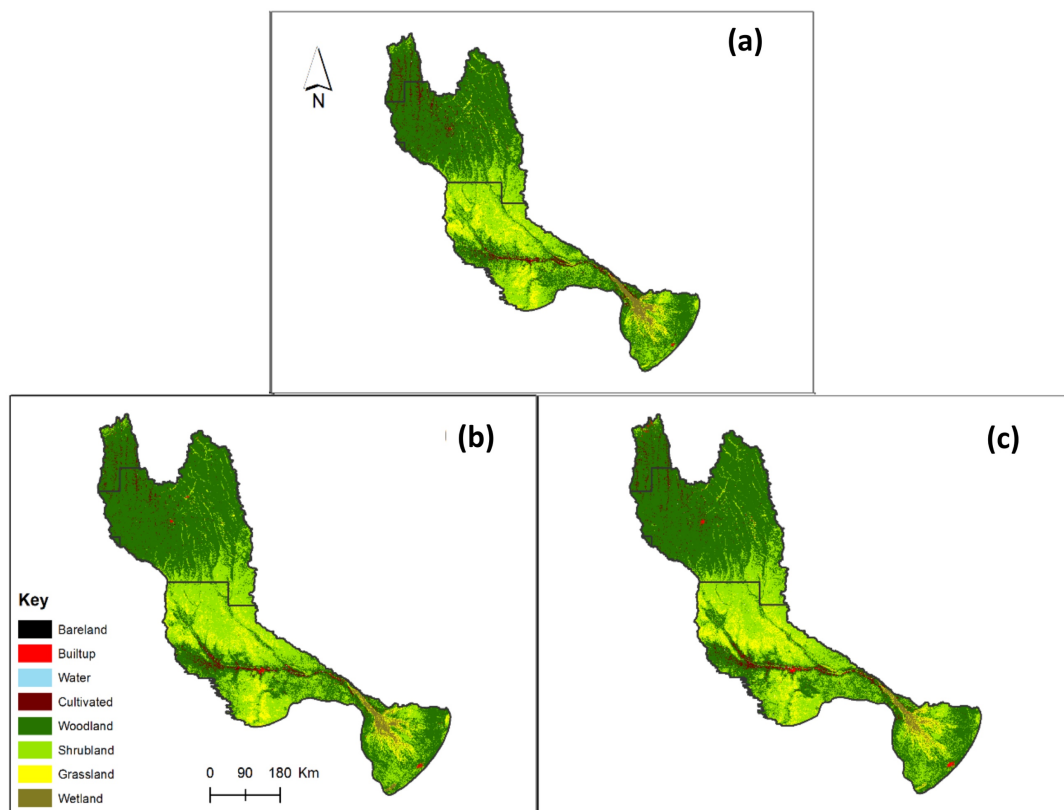

**Figure S1:** Land use/cover classification output during the years 2004(a), 2013(b) and 2020(c) in the Okavango basin.

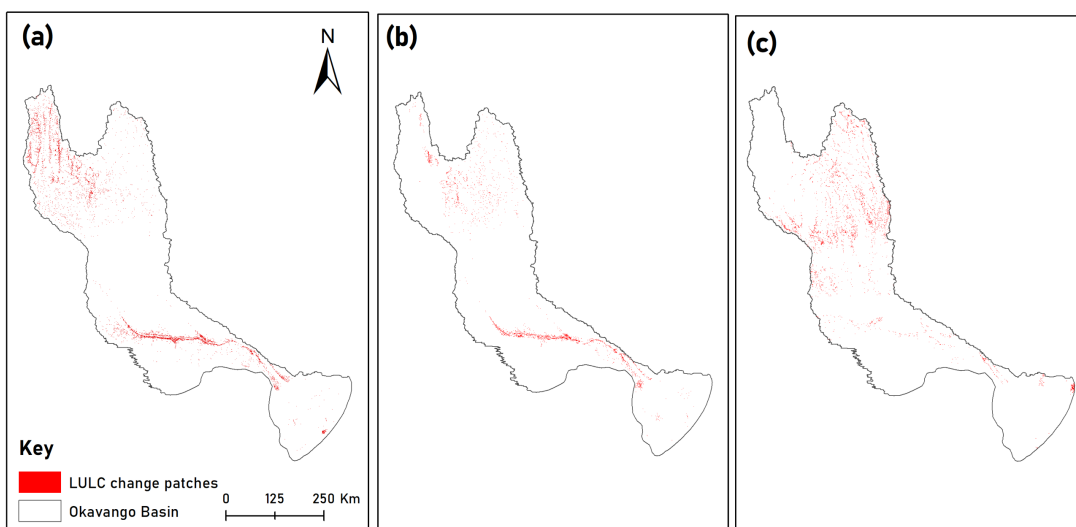

**Figure S2:** Map shows the LULC change patches for different LULC change transitions where; (a)- transition from natural to artificial, (b) transition from artificial to natural, (c)- transition from natural to natural classes.
